# Supplementary material
Source: PubMed Central journal article supplement (PMC4859719)
Supplement: JVI.00099-16_zjv999091627so1.pdf [file JVI.00099-16_zjv999091627so1.pdf]

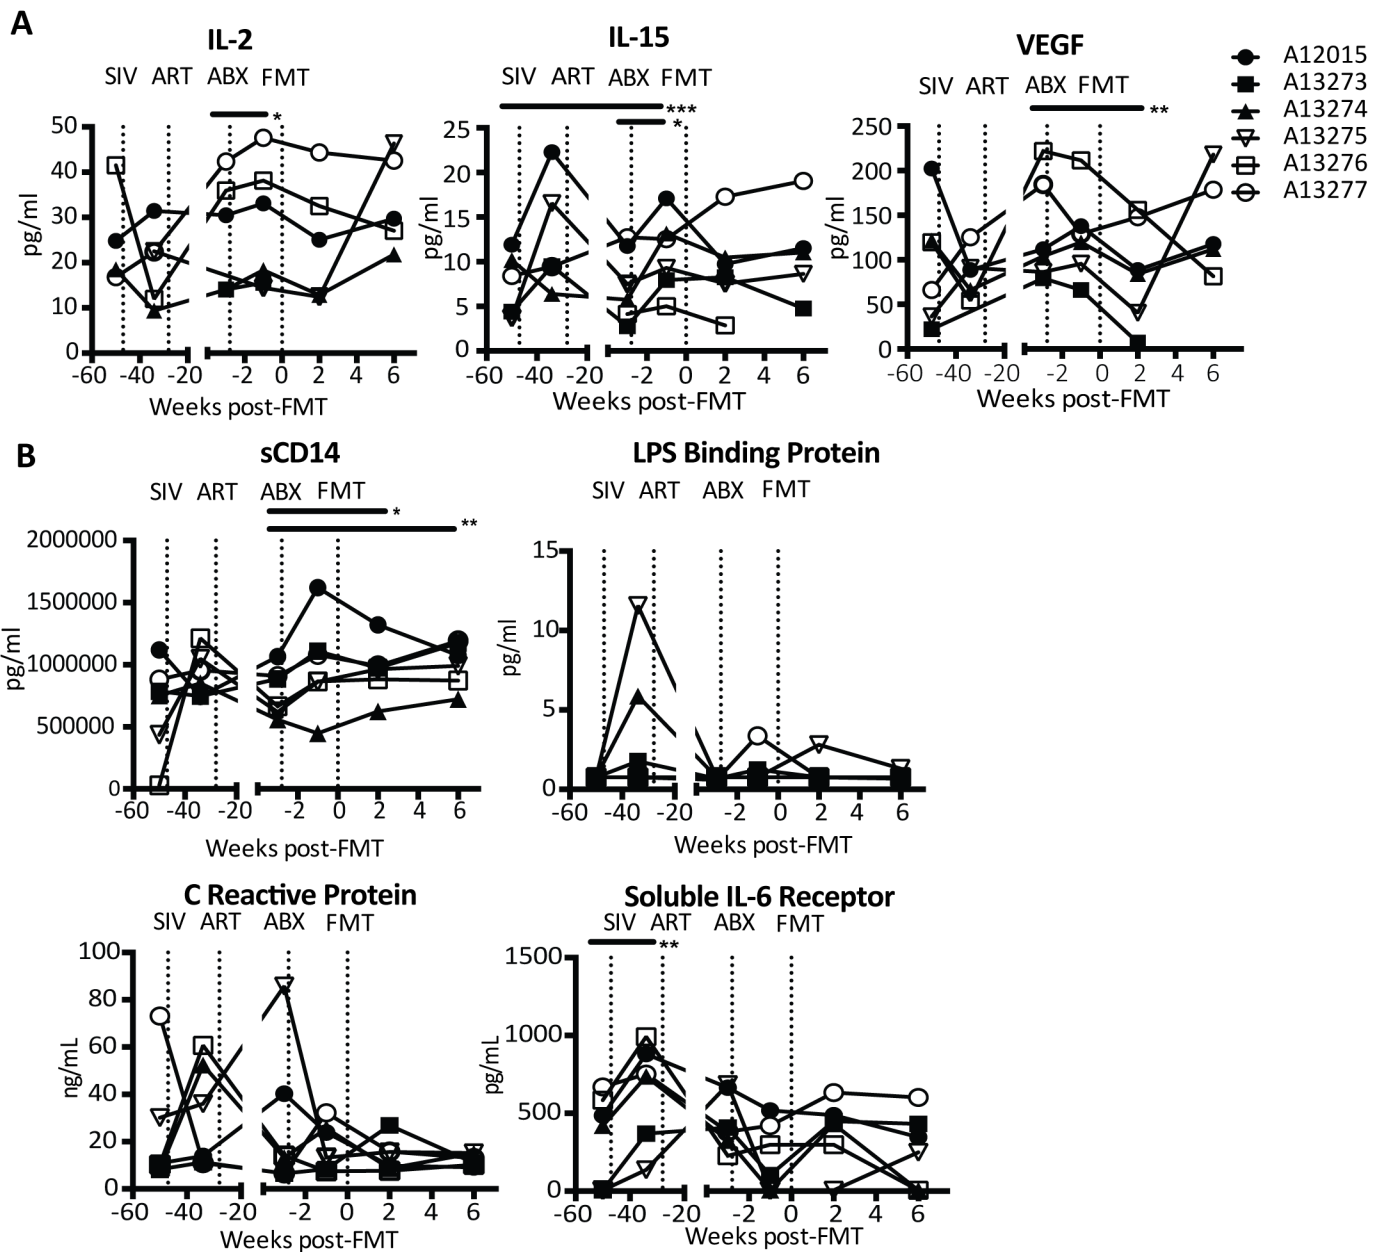

**Supplementary Figure 1.** Changes in soluble markers of inflammation and mucosal damage after ABX and FMT treatments. *A.* Plasma levels of IL-2, IL-15, and VEGF measured by Luminex. *B.* Plasma levels of sCD14, LPS binding protein, C reactive protein, and soluble IL-6 receptor measured by ELISA. Asterisks indicate significant difference by paired t test (\* $P < 0.005$ , \*\* $P < 0.01$ , \*\*\* $P < 0.001$ ).
